# Supplementary material for: The stabilization of fluorescent copper nanoclusters by dialdehyde cellulose and their use in mercury ion sensing
Source: Royal Society of Chemistry journal article supplement (doi:10.1039/d0ay00657b), 2020-01-01
Supplement: d0ay00657b1.pdf [file d0ay00657b1.pdf]

## Electronic Supplementary Information (ESI)

### Stabilization of Fluorescent Copper Nanoclusters by Dialdehyde

### Cellulose and Its Use in Mercury Ions Sensing

Xiangyu Feng<sup>a</sup>, Jiaying Zhang<sup>a</sup>, Jing Wang<sup>a</sup>, Ailing Han<sup>a</sup>, Guozhen Fang<sup>a</sup>, Jifeng Liu<sup>\*a</sup> and Shuo Wang<sup>\*b</sup>

---

<sup>a</sup> *State Key Laboratory of Food Nutrition and Safety, College of Food Engineering and Biotechnology, Tianjin University of Science and Technology, 300457 Tianjin, China.*

<sup>b</sup> *Research Centre of Food Science and Human Health, School of Medicine, Nankai University, 300071 Tianjin, China*

† Jifeng Liu, Email: liujifeng111@gmail.com. Shuo Wang, Email: s.wang@tust.edu.cn

## Content list

1. Effect of Cu source concentration, PATP concentration, volume ratio of Cu/PATP on the PL of Cu NCs.....S3

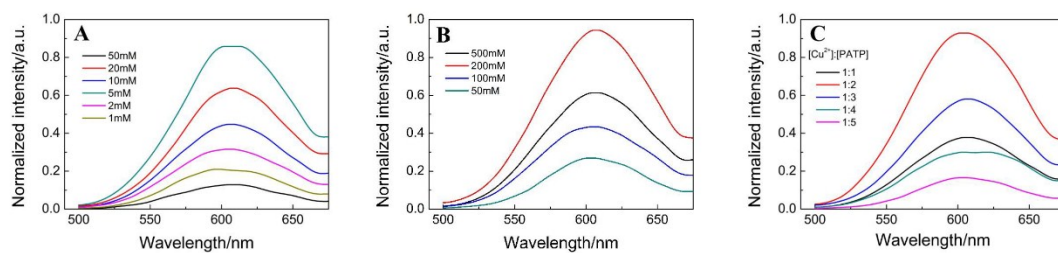

**Figure S1.** (A) Effect of Cu source concentration on the PL of Cu NCs. (B) Effect of PATP concentration the PL of Cu NCs. (C) Effect of the volume ratio of Cu/PATP on the PL of Cu NCs.
